# Supplementary material for: Discovery of Molecular DNA Methylation-Based Biomarkers through Genome-Wide Analysis of Response Patterns to BCG for Bladder Cancer
Source: Cells. 2020 Aug 5;9(8):1839. doi: 10.3390/cells9081839 (PMC7464079; doi:10.3390/cells9081839)
Supplement: Supplementary file 1 [file cells-09-01839-s001.zip]

Archive with 9 entries (9 files):
- Supplementary Figure1.pdf
- Supplementary Figure2.pdf
- Supplementary Figure3.pdf
- Supplementary Figure4.pdf
- Supplementary Figure5.pdf
- SupplementaryTable1.xlsx
- SupplementaryTable2.xlsx
- SupplementaryTable3.xlsx
- SupplementaryTable4.xlsx
