# Supplementary material for: Discovery of Molecular DNA Methylation-Based Biomarkers through Genome-Wide Analysis of Response Patterns to BCG for Bladder Cancer
Source: Cells. 2020 Aug 5;9(8):1839. doi: 10.3390/cells9081839 (PMC7464079; doi:10.3390/cells9081839)
Supplement: Supplementary file 1 [file cells-09-01839-s001.zip › SupplementaryTable1.xlsx]

## Sheet: Sheet1
	Characteristic	Responders (n = 19)	Failures (n = 18)		Characteristic	Responders (n = 20)	Failures (n = 19)
	Age, y				Age, y
	Median	69	70		Median	74	73
	Range	51-86	57-93		Range	46-83	57-82
	Sex, no. (%)				Sex, no. (%)
	Male	17 (89)	11 (61)		Male	19 (95)	15 (79)
	Female	2 (11)	7 (39)		Female	1 (5)	4 (21)
	T Stage, no. (%)				T Stage, no. (%)
	Tis	0 (0)			Tis	0	0
	Ta	5 (26)	2 (11)		Ta	4 (20)	2 (11)
	T1	14 (74)	16 (89)		T1	16 (80)	17 (89)
	T1a	6 (32)	4 (22)		T1a
	T1b	5 (26)	5 (28)		T1b
	T1 ns	3 (16)	7 (39)		T1 ns
	Tumor grade, no. (%)				Tumor grade, no. (%)
	High	18 (95)	16 (89)		High	18 (90)	19 (100)
	Not specified	1 (5)	2 (11)		Not specified	2 (10)	0
	Concomitant CIS, no. (%)	11 (58)	8 (44)		Concomitant CIS, no. (%)	1 (5)	3 (16)
	Type of failure, no. (%)				Type of failure, no. (%)
	BCG refractory+early recurrence	-	13 (72)		BCG refractory+early recurrence	-	16 (84)
	BCG late recurrence	-	5 (28)		BCG late recurrence	-	3 (16)
	Follow-up time since TURBT, mo	27 (5-103)	11 (2-30)		Follow-up time since TURBT, mo	30 (10-47)	23 (5-41)
	Table S1a Internal validation cohort				Table S1b External validation cohort
