# Supplementary material for: Discovery of Molecular DNA Methylation-Based Biomarkers through Genome-Wide Analysis of Response Patterns to BCG for Bladder Cancer
Source: Cells. 2020 Aug 5;9(8):1839. doi: 10.3390/cells9081839 (PMC7464079; doi:10.3390/cells9081839)
Supplement: Supplementary file 1 [file cells-09-01839-s001.zip › SupplementaryTable2.xlsx]

## Sheet: Sheet1
Primer Name	Sequence	Tm	CpG content	Amplicon length	Chromosome
FW_Human_BCG_GPR158	GGGGAAGTGGTTAGTTTTGGTTAG	58	10	172	chr10
RW_Human_BCG_GPR158	CTCCAAAAAACTCCACACCAAC
FW_Human_BCG_KLF8	TGGGTTTAGTAGGGTTAGAGAAAGA	58	10	188	chrX
RW_Human_BCG_KLF8	ACCCCAAAACAAAAACTTCAAC
FW_Human_BCG_FLT1	TTATTTGTGAGAAGTAGATAGTTGAGTAG	55	28	216	chr13
RW_Human_BCG_FLT1	AAAAAATAATTATCTCCTAACTAAAACC
FW_Human_BCG_WDR44	GGTGGTAGTAATATTTTTTGGATTAAT	57	16	207	chrX
RW_Human_BCG_WDR44	AAAAAATAACTCTTATCTCCTCCTC
FW_Human_BCG_CHST11	GTTGGGTTGTTTTTTGAAAGAAAAA	58	5	87	chr12
RW_Human_BCG_CHST11	ATTACCCCAAACCCCCAAAA
FW_Human_BCG_C12orf42	GGTTTTATTTTATTTTGTTAGGGGG	59	18	194	chr12
RW_Human_BCG_C12orf42	CAAAACAACCCCATTATAATTACCC
FW_Human_BCG_CNKSR2	TTGTTGGTATTTGTTTGTTTGTTAGATAGA	57	29	196	chrX
RW_Human_BCG_CNKSR2	AAAACCTCCTACCACCCAAAATATCT
FW_Human_BCG_GRK1	TTTGAGGTATGAATTAGGATAGGTAG	58	5	137	chr13
RW_Human_BCG_GRK1	ACCCTTCACAACAATAACCTTAAAC
FW_Human_BCG_HECW1	TAGAAATAAAATTGTTTTGGTGAGT	58	9	144	chr7
RW_Human_BCG_HECW1	CAACTCTAATCCTACTAAACATAATTAAAA
FW_Human_BCG_TOX2	TTTTAAATATTTAGGGTAAGGGAGTGTT	55	10	136	chr20
RW_Human_BCG_TOX2	CCTACATCCCTAAAAAAAAC
FW_Human_BCG_CTD-2194D22.4	TAGTTTTAATAGGATAGTGGGAAGG	58	10	121	chr5
RW_Human_BCG_CTD-2194D22.4	CCCTAAATAAAACAACCCAAAC
FW_Human_BCG_TRIM36	AGTAGTTTTGGTTGGTGGGGTAG	56	11	64	chr5
RW_Human_BCG_TRIM36	AACATCTCTAAAATAAACCAAAAAAAA
FW_Human_BCG_MCHR2-AS1	GGGGTTTAGGTATAGGAATAGTTAAA	54	10	144	chr6
RW_Human_BCG_MCHR2-AS1	AAACAAAAATACCTTCAAATTTTATTC
FW_Human_BCG_CCDC181	AGGGTTAGTGAAGTTGAGGTTTTTAAG	58	6	105	chr1
RW_Human_BCG_CCDC181	AAAAAAATTTCACAACCAACACAAC
FW_Human_BCG_TXNRD2	GTTTTTGGGGTAGTTAGGGTTGTT	58	19	165	chr22
RW_Human_BCG_TXNRD2	TCCCAATATTCCACCCTAAATCTAAAA
FW_Human_BCG_LMX1A	TTTTAAGGTTAGGAGGGAAGGTAGAG	58	5	93	chr1
RW_Human_BCG_LMX1A	ACCCCTATCAAAAACTACAAAATCC
FW_Human_BCG_NLRP7	TTTTAGTTTGTGTTTTTTGTAAAGGAAA	58	4	213	chr19
RW_Human_BCG_NLRP7	AAACCCACTAAAACCCAATTACAAC
FW_Human_BCG_CCL28	GATTTGGTGAGGAGGTTTTTTTAAG	59	10	129	chr5
RW_Human_BCG_CCL28	CTACCTAAAACTCCACCCTACCTACC
FW_Human_BCG_AKAIN1	TGTTAAGTTAATAGGTTTTGGAGGTT	59	4	92	chr18
RW_Human_BCG_AKAIN1	ATATCCTTCCTCTTACTCTCTTCCTAAC
FW_Human_BCG_SIM1	AGAAAGATGAGTTTTATGTTTAGGTTGG	60	12	204	chr6
RW_Human_BCG_SIM1	CCCTCTACCTCAAATCATCCACTAC
FW_Human_BCG_SIPA1	AAATAGTGGTAGATTTTTGAGTATTTGTTG	58	4	95	chr11
RW_Human_BCG_SIPA1	CTTATACCTACCTTCCAAACCAACC
FW_Human_BCG_COL21A1	GGGAGTAGGAGGTGTTTTTTTATTTG	60	5	100	chr6
RW_Human_BCG_COL21A1	ACCTAAAACATACCTATCCCCCTAAC
FW_Human_BCG_GNE	TGGTTTTGTATTTAAGGAGGGATTTTT	56	8	168	chr9
RW_Human_BCG_GNE	AATCATCAATTCACACTCCACCAATAT
FW_Human_BCG_AFF3	GGGATAAATTGGTTTTTGGGTGT	60	4	80	chr2
RW_Human_BCG_AFF3	CCTTCTAACTAATCACCTACCTTTCCAA
FW_Human_BCG_KDM2B	GGGTAAATGTAGGTTTTAGGAGGAGT	61	18	179	chr12
RW_Human_BCG_KDM2B	AATCTCAACCCTTCCATTTCAACTT
FW_Human_BCG_DSC3	TTTATTTGTTAGGGTGGAGGGTTAG	61	16	181	chr18
RW_Human_BCG_DSC3	TCAAACTTCAACAAAATTTCATTCC
FW_Human_BCG_PTPRN2	GGAAGTAGGTTTGGGAGTTTTTTTT	61	11	203	chr7
RW_Human_BCG_PTPRN2	CAACCCTCAAAACACAAACTATCTC
FW_Human_BCG_TSPAN11	AGGAGGTAGGAATGTTTGGGATATT	57	5	126	chr12
RW_Human_BCG_TSPAN11	CTCCCAAAACACAAATACAAAAAAAC
FW_Human_BCG_STAG3	GGGGATTTTTTTTGAATTTTGTT	56	7	199	chr7
RW_Human_BCG_STAG3	AAAAATAAACTCTCAATCTATAAAAACCTA
FW_Human_BCG_GLT1D1	GTAGAAGTAGGATGGGAGTAGGATT	58	21	219	chr12
RW_Human_BCG_GLT1D1	AAAAAAACTAACCAACCAAAAAAAC
FW_Human_BCG_PTPRZ1_NEW	AAATTTTTAGAGGTGAAATTTAAAGGTTAA	60	9	159	chr7
RW_Human_BCG_PTPRZ1_NEW	AATCCCAAAATAACAATTCACACAC
FW_Human_BCG_NPHS2	GTTGAAGTAGAGAGAGGTTTGGGTG	58	6	116	chr1
RW_Human_BCG_NPHS2	AACCCTCCAAAAAATAAATCTTCACA
FW_Human_BCG_ZNF560_NEW	TAAAGGAAAAAGTGGTTTTGAGGAAATA	62	4	212	chr19
RW_Human_BCG_ZNF560	TCTCTCTTACCCACCCAAACACTAA
