# Supplementary material for: Discovery of Molecular DNA Methylation-Based Biomarkers through Genome-Wide Analysis of Response Patterns to BCG for Bladder Cancer
Source: Cells. 2020 Aug 5;9(8):1839. doi: 10.3390/cells9081839 (PMC7464079; doi:10.3390/cells9081839)
Supplement: Supplementary file 1 [file cells-09-01839-s001.zip › SupplementaryTable3.xlsx]

## Sheet: Sheet1
Illumina ID	Chromosome	Start	End	p-value	ß-value
cg23696472	chrX	53111786	53111787	0.00777557	-0.182244
cg25870731	chrX	140271029	140271030	0.00325918	-0.173013
cg25940844	chrX	19533340	19533341	0.00176671	-0.17229
cg25452717	chrX	83442847	83442848	0.00199187	-0.170707
cg05476522	chrX	54521732	54521733	0.00819285	-0.161255
cg25920406	chr10	35929369	35929370	0.0106335	-0.150375
cg06676637	chr18	56940333	56940334	0.0190462	-0.150072
cg06674062	chr7	94285887	94285888	8.08e-05	-0.164605
cg00691480	chrX	148713506	148713507	0.00776885	-0.160982
cg01876338	chr2	54087008	54087009	0.00118837	-0.184965
cg26186727	chr18	70534534	70534535	0.0103609	-0.163367
cg02914422	chr7	32110145	32110146	0.0104418	-0.151758
cg15989068	chr2	5837057	5837058	0.00197883	-0.181019
cg23668184	chr2	5836713	5836714	0.00960586	-0.152346
cg22418909	chr8	41166738	41166739	0.000114357	-0.222423
cg27076487	chrX	140271364	140271365	0.00069692	-0.175491
cg05788681	chrX	103499545	103499546	0.0119572	-0.174047
cg11005845	chrX	140271314	140271315	0.000574046	-0.165944
cg03447800	chrX	103499585	103499586	0.0410397	-0.158202
cg05425577	chrX	54522221	54522222	0.0135909	-0.157758
cg01891172	chrX	21676483	21676484	0.0308914	-0.155039
cg19535896	chr2	187713876	187713877	0.00564222	-0.154704
cg09112156	chrX	140271259	140271260	0.00336099	-0.154641
cg07697895	chr7	116963259	116963260	0.00911317	-0.170037
cg03323696	chr5	59189120	59189121	0.00669236	-0.169884
cg08992305	chr4	165878219	165878220	0.00930339	-0.166046
cg21568145	chr19	47507399	47507400	0.00490713	-0.172981
cg17431280	chr19	47507461	47507462	0.0229806	-0.169257
cg06598544	chr20	61472147	61472148	0.00632935	-0.15215
cg16558432	chr17	5403805	5403806	0.0358791	-0.152165
cg17814335	chrX	74143945	74143946	0.00140251	-0.188385
cg03419885	chr11	125036385	125036386	0.00543695	-0.160889
cg03059131	chr15	60296996	60296997	0.0385702	-0.157653
cg19062189	chrX	101771625	101771626	0.000855195	-0.206975
cg03102729	chrX	120181504	120181505	0.01048	-0.1593
cg09670128	chr12	52627047	52627048	0.0092908	-0.15772
cg00159100	chr7	37487633	37487634	0.0103445	-0.152017
cg08405463	chrX	118108651	118108652	0.010448	-0.154372
cg20749341	chrX	118108666	118108667	0.0160136	-0.150819
cg11358689	chr11	131781260	131781261	0.00206611	-0.196538
cg19717586	chr11	131781257	131781258	0.00113887	-0.17643
cg12785025	chrX	147582422	147582423	0.000742221	-0.217875
cg05806018	chrX	147582520	147582521	0.00199947	-0.188571
cg08781559	chr1	53309019	53309020	0.00672876	-0.180518
cg05049545	chrX	18372696	18372697	0.00888262	-0.150321
cg17698295	chr8	145106299	145106300	0.00393639	-0.204608
cg26256223	chr8	145106582	145106583	0.0179959	-0.189872
cg03743205	chr16	88600835	88600836	0.0379017	-0.163376
cg10674704	chrX	23353620	23353621	0.00355848	-0.161343
cg01321673	chr22	50438363	50438364	0.00173684	-0.160519
cg17478979	chr6	149772150	149772151	0.00056435	-0.157768
cg25156118	chr19	39799137	39799138	0.000620537	-0.155798
cg22958090	chr12	52627438	52627439	0.0103927	-0.151768
cg07920503	chr13	25745406	25745407	0.00299249	-0.207204
cg17479100	chrX	48768940	48768941	0.0111459	-0.159507
cg12614702	chrX	48768927	48768928	0.00478	-0.157155
cg14494468	chr14	36988298	36988299	0.00753157	-0.159207
cg03660500	chr1	197887649	197887650	0.0140603	-0.177496
cg27533288	chr10	118896776	118896777	0.0157907	-0.164223
cg21242918	chr10	118897194	118897195	0.0173038	-0.162711
cg10235355	chr17	6358830	6358831	0.0404088	-0.152994
cg09342610	chrX	135333415	135333416	0.00726631	-0.172882
cg16515238	chrX	119444909	119444910	0.00868139	-0.157207
cg08489551	chr1	6531260	6531261	0.0282771	-0.153261
cg25448523	chr14	24780716	24780717	0.00606106	-0.150482
cg21940586	chrX	153151644	153151645	0.00187899	-0.151146
cg00525383	chrX	136647793	136647794	0.0121984	-0.167834
cg03109827	chr10	133110349	133110350	0.00576877	-0.164038
cg22881914	chr14	52536147	52536148	0.0462579	-0.159257
cg02300154	chr7	70597058	70597059	0.011098	-0.155435
cg23251359	chrX	50214465	50214466	0.00247097	-0.15085
cg01742836	chrX	135229755	135229756	0.0196106	-0.165777
cg21040569	chrX	137793665	137793666	0.00798792	-0.150923
cg09137328	chr10	25463948	25463949	0.00322039	-0.160586
cg15778745	chr13	88324570	88324571	0.00367503	-0.178151
cg09083627	chr13	88324597	88324598	0.000997373	-0.173164
cg21053831	chr18	4455512	4455513	0.00196094	-0.167605
cg23680829	chrX	153775330	153775331	0.00734714	-0.160839
cg08417382	chrX	153775328	153775329	0.010618	-0.159777
cg02869694	chrX	153775262	153775263	0.0104104	-0.158852
cg03462329	chr10	28035178	28035179	0.00921074	-0.155254
cg05381746	chr10	28035208	28035209	0.00703496	-0.150995
cg20597646	chrX	99666346	99666347	0.00199742	-0.178111
cg23767642	chrX	41782872	41782873	0.00620129	-0.171866
cg24589459	chr2	198651347	198651348	0.0198375	-0.160502
cg21881253	chr11	111383576	111383577	0.00269599	-0.152982
cg24401557	chrX	137793853	137793854	0.020701	-0.168923
cg13793788	chr4	158141565	158141566	0.00254266	-0.184317
cg00699993	chr4	158141570	158141571	0.00336252	-0.170535
cg21209095	chr4	158141581	158141582	0.00183129	-0.165464
cg08902358	chrX	135229362	135229363	0.000618846	-0.182488
cg22934939	chrX	136648313	136648314	0.00452467	-0.206655
cg19274890	chr7	153584042	153584043	0.00848027	-0.172221
cg05137263	chrX	30327625	30327626	0.00712098	-0.165013
cg14482313	chr12	52626889	52626890	0.0046838	-0.160196
cg03419058	chr15	26108391	26108392	0.00749905	-0.160126
cg15124215	chr4	172734426	172734427	0.00883465	-0.159362
cg06915321	chrX	136648249	136648250	0.0213396	-0.153696
cg00240113	chrX	136648241	136648242	0.014216	-0.151141
cg20124450	chr15	26108401	26108402	0.00816499	-0.150532
cg00064733	chr7	153584038	153584039	0.0129475	-0.150449
cg01834022	chr4	5710411	5710412	0.00575513	-0.154989
cg25627226	chr18	4455337	4455338	0.0143735	-0.158799
cg14270292	chr6	133562494	133562495	0.0154595	-0.156548
cg09547119	chr19	52391367	52391368	0.0161976	-0.182102
cg03555976	chrX	153979488	153979489	0.00935434	-0.165409
cg23010048	chr19	52391257	52391258	0.0281112	-0.172252
cg10783469	chr19	52391234	52391235	0.0289813	-0.157642
cg08980509	chrX	147582041	147582042	0.00297981	-0.19537
cg26212480	chrX	53024719	53024720	0.00337286	-0.184718
cg06319475	chr8	145105829	145105830	0.00352537	-0.212821
cg09896412	chr1	98519101	98519102	0.000425183	-0.212565
cg13601435	chr9	120507431	120507432	0.00285324	-0.20536
cg14516385	chrX	37003934	37003935	0.00172549	-0.182322
cg26750617	chr12	132293702	132293703	0.00236465	-0.178773
cg20778411	chrX	37003920	37003921	0.00379545	-0.172249
cg04402798	chrX	37003511	37003512	0.00973264	-0.168002
cg15333426	chr4	10463620	10463621	0.00701721	-0.160601
cg00228017	chr18	53447841	53447842	0.00841045	-0.160062
cg19082708	chr7	64349557	64349558	0.0180369	-0.159497
cg15477247	chr5	176046144	176046145	0.00506972	-0.159017
cg05260852	chrX	54665817	54665818	0.000616962	-0.156753
cg09735465	chr9	120507228	120507229	0.0186597	-0.156327
cg05260242	chr13	28528474	28528475	0.0360629	-0.155532
cg11430197	chr8	43102008	43102009	0.0138098	-0.153556
cg24062763	chr2	39470750	39470751	0.00371715	-0.152693
cg24425021	chr13	79177520	79177521	0.00213656	-0.198969
cg24402300	chr19	55591437	55591438	0.00827452	-0.153546
cg08269402	chr6	32549631	32549632	0.00374683	-0.158912
cg17957186	chr13	79177895	79177896	0.00723493	-0.151362
cg20617821	chr5	158527560	158527561	0.0209805	-0.155436
cg22806002	chr11	111383083	111383084	0.000104514	-0.177236
cg27398263	chr13	79177700	79177701	0.00461169	-0.215442
cg17576288	chr13	79177877	79177878	0.00214635	-0.164534
cg25682299	chr13	79177886	79177887	0.00157424	-0.157711
cg09010671	chr13	79177763	79177764	0.0188845	-0.151198
cg11905850	chr8	57348622	57348623	5.59e-05	-0.15274
cg16306898	chr1	1475675	1475676	0.0151441	-0.165933
cg22373181	chr2	39893080	39893081	0.000256083	-0.200534
cg11879785	chr12	77271590	77271591	0.00264981	-0.151887
cg09022230	chr7	5457225	5457226	0.00123167	-0.183749
cg08251761	chr11	470197	470198	0.00128679	-0.166669
cg11724970	chr7	27182493	27182494	0.00107486	-0.156213
cg25593911	chr5	86563101	86563102	3.12e-05	-0.192162
cg20027289	chr11	93861395	93861396	0.000369783	-0.155161
cg27496650	chr8	60032246	60032247	0.00220904	-0.153485
cg05842986	chrX	48333972	48333973	2.04e-05	-0.169777
cg14885204	chr7	121512527	121512528	0.000470846	-0.153242
cg04298672	chrX	103411016	103411017	0.000628912	-0.164133
cg25662463	chr10	118897857	118897858	0.00496119	-0.189831
cg13457172	chr10	118897847	118897848	0.00404387	-0.189298
cg16043357	chr10	118897904	118897905	0.00532881	-0.187732
cg26339504	chr10	118897859	118897860	0.0188122	-0.150998
cg04599552	chr10	51565046	51565047	0.000160038	-0.15669
cg04063615	chr12	132293388	132293389	0.00248609	-0.168607
cg04780572	chr1	111097901	111097902	0.00218996	-0.157037
cg04043795	chr2	5836366	5836367	0.00149643	-0.158731
cg18523259	chrX	152912529	152912530	0.00299488	-0.161053
cg02393845	chr1	197887438	197887439	0.0082505	-0.170184
cg05961492	chr22	47459539	47459540	0.0147718	-0.171438
cg26255741	chr10	94003210	94003211	8.11e-05	-0.153307
cg20967739	chr1	50895827	50895828	2.96e-05	-0.182446
cg25148589	chr4	158141936	158141937	0.00123414	-0.164313
cg17889682	chr7	95402733	95402734	0.0173287	-0.152098
cg23018755	chr17	79881529	79881530	0.00147931	-0.150666
cg05269167	chr1	205563162	205563163	0.00158394	-0.152662
cg22356226	chr12	2922697	2922698	6.69e-06	-0.173027
cg00850648	chrX	138285828	138285829	0.0031788	-0.161495
cg02189477	chr16	3550662	3550663	0.000620226	-0.173368
cg10361998	chr6	134639454	134639455	0.0013822	-0.160755
cg17024708	chr22	44258638	44258639	0.0162654	-0.156063
cg05007115	chr11	107328843	107328844	0.00367704	-0.153088
cg07025511	chr2	5831700	5831701	0.000737095	-0.174938
cg16491426	chr17	41911665	41911666	7.43e-05	-0.154514
cg19319069	chr7	129593010	129593011	0.000167733	-0.177302
cg25361850	chr19	52391789	52391790	0.00225753	-0.163166
cg19916129	chr13	113242878	113242879	0.00209933	-0.178599
cg00079479	chrX	133119778	133119779	0.000190891	-0.196296
cg20543970	chrX	133119780	133119781	0.000658101	-0.167304
cg11146691	chr12	47219737	47219738	0.0101536	-0.183522
cg24393673	chr1	102312610	102312611	0.00332	-0.151246
cg16340188	chr1	153820642	153820643	0.0172427	-0.161185
cg23997156	chr21	44144392	44144393	0.000624576	-0.157683
cg04634656	chr1	202457704	202457705	0.00325442	-0.155227
cg13372276	chr13	103307218	103307219	0.00742441	-0.221718
cg14780448	chr4	159730342	159730343	0.0302474	-0.178629
cg03544800	chr1	94336935	94336936	0.0476641	-0.166564
cg10169915	chrX	69417166	69417167	0.00063242	-0.164676
cg16207330	chr12	53085125	53085126	0.00837003	-0.162534
cg14596422	chr18	29259508	29259509	1.35e-05	-0.161345
cg22688137	chr1	218633498	218633499	0.000104557	-0.159845
cg07584516	chr13	42269266	42269267	0.000634651	-0.155289
cg20607506	chr3	121574469	121574470	0.000193823	-0.154006
cg24398568	chr8	139801592	139801593	1.03e-05	-0.153492
cg08605516	chr5	7653050	7653051	0.000552383	-0.152716
cg26544530	chr13	28896826	28896827	0.00139573	-0.151784
cg22867893	chr11	74988026	74988027	2.27e-05	-0.33294
cg00281009	chr1	55033800	55033801	0.00289379	-0.218283
cg11667502	chr4	185632965	185632966	0.000444153	-0.203578
cg11601920	chr12	64680448	64680449	0.00648751	-0.200009
cg00814598	chr17	70658268	70658269	0.0198794	-0.19768
cg18741833	chr20	44001635	44001636	0.00115452	-0.196435
cg09068955	chr2	213316572	213316573	0.00494938	-0.176692
cg16733946	chrX	102809791	102809792	0.0157071	-0.171566
cg17533331	chr3	11845535	11845536	0.000190857	-0.160922
cg22242402	chr8	30273472	30273473	0.00110932	-0.17167
cg08356579	chr12	46887123	46887124	0.000911769	-0.161935
cg17671621	chr2	242077496	242077497	0.0278954	-0.166176
cg19815376	chr6	114225306	114225307	0.00138546	-0.163882
cg09148021	chr1	78470417	78470418	0.000614763	-0.151313
cg18124907	chrX	55478610	55478611	0.00114752	-0.172963
cg04655378	chr17	47492883	47492884	0.000363343	-0.153418
cg07601320	chr12	47219841	47219842	0.0199189	-0.16984
cg21428710	chr12	47219797	47219798	0.0182133	-0.164476
cg11331445	chr12	47219877	47219878	0.0294771	-0.161732
cg07780180	chr1	196620870	196620871	0.000236791	-0.155529
cg13176741	chrX	102809882	102809883	0.0189045	-0.153421
cg14544439	chr13	103331931	103331932	0.0183024	-0.205601
cg04824490	chr3	42341334	42341335	6.38e-06	-0.197037
cg10463322	chr6	168796261	168796262	0.0155316	-0.187687
cg06639296	chr11	27798868	27798869	1.69e-05	-0.180115
cg08914944	chr16	1349928	1349929	0.0030335	-0.166242
cg26184987	chr5	173293671	173293672	0.000448502	-0.165103
cg27497341	chr15	38173016	38173017	1.67e-05	-0.165038
cg19384241	chr2	55393977	55393978	0.0367298	-0.164596
cg25697809	chr4	149773476	149773477	0.000627151	-0.163055
cg16596266	chr11	104127707	104127708	0.0225145	-0.158004
cg26438929	chr15	45750668	45750669	0.000163583	-0.157831
cg18402987	chr7	1209562	1209563	0.0103091	-0.157127
cg19016664	chr17	698494	698495	0.000407273	-0.15658
cg03188948	chr7	1209495	1209496	0.0146055	-0.155491
cg22907979	chr1	7946076	7946077	0.00197328	-0.154952
cg18740800	chr11	27914934	27914935	0.000213244	-0.154049
cg25616055	chr12	89638890	89638891	0.000695276	-0.153066
cg07062100	chr1	172887254	172887255	0.000539369	-0.152125
cg15169286	chr5	36417932	36417933	0.0049592	-0.151673
cg09480112	chr4	104936874	104936875	4.66e-06	-0.150606
cg09871836	chr17	8251290	8251291	0.0410377	-0.150379
cg19246007	chr6	56112216	56112217	0.00448073	0.167852
cg22830502	chr19	51684722	51684723	0.0035641	0.152875
cg20029745	chr18	28621985	28621986	0.0037022	0.153761
cg16562486	chr1	2925740	2925741	0.000228052	0.16783
cg25769889	chr18	28620915	28620916	0.0159974	0.151289
cg19388312	chr1	24304737	24304738	0.00013785	0.151706
cg03404027	chr19	1523442	1523443	0.000237975	0.160446
cg03326823	chrY	15814705	15814706	0.0137944	0.197755
cg16371007	chr20	61957879	61957880	0.00129608	0.159651
cg16749977	chr5	170745405	170745406	0.00503853	0.156177
cg00057593	chr8	143916959	143916960	0.000239326	0.153876
cg07929412	chr2	130694084	130694085	0.000278432	0.211376
cg06230714	chr20	58181636	58181637	0.00393225	0.152477
cg06065495	chrY	21666309	21666310	0.00203748	0.165222
cg26506316	chr1	119870682	119870683	0.0103382	0.16039
cg19275133	chr11	128812913	128812914	0.00298108	0.150104
cg00735885	chrX	111874418	111874419	0.00272054	0.153456
cg11513221	chr20	45129011	45129012	0.00695155	0.16105
cg04291383	chr1	12787380	12787381	0.000400933	0.150986
cg04761051	chr9	28925457	28925458	0.00133603	0.166199
cg21365387	chr15	29235401	29235402	0.00561682	0.151803
cg15131258	chr20	31805182	31805183	0.000913539	0.155933
cg16440909	chrX	149613745	149613746	0.00201257	0.159691
cg11222557	chr11	99196762	99196763	0.010404	0.170636
cg09966085	chr18	42588939	42588940	0.00642147	0.153435
cg11790363	chr4	184196921	184196922	0.00163499	0.154096
cg07173299	chr21	29483784	29483785	0.000969688	0.154436
cg24364891	chr10	6882083	6882084	0.0129034	0.157043
cg17403974	chrX	115304403	115304404	0.000554794	0.163928
cg05013890	chr6	167149848	167149849	0.000516464	0.179624
cg06354054	chr12	125440391	125440392	0.00160103	0.186213
cg13079150	chr19	54655647	54655648	0.013584	0.202409
cg12117283	chr18	8625641	8625642	0.0031308	0.22052
cg23985388	chr17	31350176	31350177	2.89e-06	0.150597
cg22495191	chr1	154834293	154834294	0.000640959	0.153185
cg10635102	chr16	31374543	31374544	1.19e-06	0.156693
cg07053641	chr4	5661997	5661998	0.00200298	0.158584
cg09441002	chrX	50361940	50361941	0.000280557	0.158835
cg12262617	chr5	150677795	150677796	0.0303001	0.161598
cg07856430	chr18	42339206	42339207	0.00858226	0.163506
cg00545801	chr12	32455325	32455326	0.00296763	0.171327
cg21627809	chrX	17823978	17823979	6.3e-05	0.156752
cg05873820	chr3	14506503	14506504	0.016841	0.151778
cg00913770	chr5	77067475	77067476	0.037886	0.15526
cg16757332	chr14	92956197	92956198	2.75e-05	0.157183
cg22755839	chr19	42489794	42489795	6e-06	0.165573
cg09145734	chr10	116367729	116367730	0.00146993	0.223015
cg07964240	chr6	34054055	34054056	0.0027617	0.15698
cg02579133	chr21	46031741	46031742	0.00046835	0.16469
cg11654011	chr19	43099795	43099796	0.00183115	0.156749
cg04505750	chr1	12774815	12774816	0.00155837	0.174791
cg09061753	chr5	173763326	173763327	0.000401478	0.162309
cg04274350	chrX	55246710	55246711	0.0123593	0.156111
cg16474118	chr2	12760191	12760192	0.000444029	0.150835
cg24240336	chr4	31296918	31296919	0.000113779	0.151921
cg14889783	chr21	45915204	45915205	0.000887194	0.15198
cg24032668	chr1	48092677	48092678	0.000806466	0.152638
cg19831877	chr19	31180617	31180618	0.000986436	0.152767
cg13117487	chr1	229889410	229889411	0.0374747	0.153047
cg12188614	chr7	54697527	54697528	0.000426575	0.154755
cg27368331	chrY	8505900	8505901	0.0202325	0.155743
cg02524236	chr10	128086694	128086695	0.00121704	0.155766
cg15056452	chr19	39745015	39745016	0.000386161	0.157079
cg01451437	chrX	153119977	153119978	8.8e-06	0.157124
cg16834683	chrX	39514130	39514131	0.000349893	0.15881
cg15372153	chr10	23846657	23846658	7.87e-05	0.163791
cg04394036	chr10	130408883	130408884	0.000733562	0.164013
cg13124798	chr4	16393241	16393242	0.00105207	0.166408
cg18892873	chr10	7084859	7084860	0.00914944	0.169503
cg07980197	chr21	40357631	40357632	0.00752658	0.169729
cg06354543	chr10	130376572	130376573	0.00118146	0.171335
cg17799614	chr21	36607318	36607319	0.00162407	0.171941
cg06393529	chr6	149027558	149027559	0.0154336	0.17981
cg01816891	chr2	42250549	42250550	0.00742856	0.181696
cg26011743	chrX	36794119	36794120	0.00183736	0.18185
cg02761835	chr8	142567232	142567233	0.0047232	0.189011
cg15935392	chr12	76053197	76053198	0.00175166	0.208756
