# Supplementary material for: Discovery of Molecular DNA Methylation-Based Biomarkers through Genome-Wide Analysis of Response Patterns to BCG for Bladder Cancer
Source: Cells. 2020 Aug 5;9(8):1839. doi: 10.3390/cells9081839 (PMC7464079; doi:10.3390/cells9081839)
Supplement: Supplementary file 1 [file cells-09-01839-s001.zip › SupplementaryTable4.xlsx]

## Sheet: Sheet1
AATF
ABCA3
ABCC1
ABCC4
ABHD16A
ABHD2
ACYP2
ADA
ADAM12
ADAMTS2
ADAMTS5
ADAMTS9
ADAMTSL3
ADARB1
ADARB2
ADCYAP1
ADGRA2
ADGRG1
ADGRL4
ADIPOQ
ADORA1
AFF3
AGAP3
AGPAT1
AHCYL2
AHNAK
AKAIN1
AKAP8
ALG9
ALOX15P1
AMDHD1
AMY2B
ANKHD1
ANKHD1-EIF4EBP3
ANKRD30B
ANKRD33B
AP5B1
AP5M1
APBB1IP
APCDD1L
APOE
AREL1
ARHGAP35
ARHGAP39
ARHGAP6
ARHGEF12
ARID1A
ARID4A
ARPP21
AS3MT
ASB8
ASCC1
ASIC2
ATAD3B
ATF6B
ATL2
ATP11A
ATP6V0A2
ATP6V0A4
ATP8A2
AUTS2
AXDND1
B4GALT3
BACH2
BAG6
BAZ1B
BBS7
BCL2L13
BIRC6
BLK
BORCS7-ASMT
BST1
C11orf54
C12orf42
C15orf59
C1orf159
C1QTNF7
C2
C2-AS1
C2CD5
C5orf38
C5orf66
C6orf136
C6orf201
C6orf48
CA10
CABIN1
CACHD1
CACNA1C
CACNA2D2
CADPS
CAMK2A
CAMK2G
CAND1.11
CASC15
CASR
CASZ1
CCDC13
CCDC170
CCDC181
CCDC192
CCDC38
CCHCR1
CCL17
CCL28
CD200R1
CD38
CD81
CD96
CDC23
CDH4
CDK12
CDK19
CDKL3
CELF2
CEP135
CETN1
CFAP221
CFAP74
CHST11
CHST8
CIB1
CIB4
CIDEA
CLEC16A
CLIC1
CLMN
CLUH
CMTM3
CNBD2
CNKSR2
CNNM2
CNTROB
COL21A1
COL23A1
COL24A1
COL25A1
COLEC11
CORO1B
CPT1A
CPVL
CRHR1-IT1-CRHR1
CRISPLD2
CRTC1
CSGALNACT1
CTBP2
CTD-2194D22.4
CTD-2297D10.2
CTNNA2
CYB561D2
CYP2C19
CYP3A7-CYP3A51P
CYSTM1
DAGLA
DCC
DEDD
DENND1B
DENND6A
DHRS4L1
DHRS7B
DHX16
DKFZp686K1684
DLAT
DLEU1
DLGAP2
DNAAF5
DNAH2
DNAH6
DNAJC11
DNHD1
DNM3
DOC2B
DOCK4
DOCK7
DPEP2
DPEP3
DRD5
DSC3
DSCR4
DTNB
DUSP5P1
DYNC1H1
E2F4
EBF2
EEFSEC
EFNB1
EFR3B
EHD1
ELAVL1
EPB41L3
EPCAM
ERC2
ERP44
EVL
EXOSC8
EXT1
EZH1
F11-AS1
FAF1
FAM151B
FAM160A1
FAM166B
FAM171A1
FAM193A
FAM198B
FAM212B
FAM212B-AS1
FAM41C
FAT3
FAXC
FBXO42
FBXW8
FER
FGF10
FGF12
FGFR2
FHAD1
FLJ12825
FLT1
FLT4
FNDC3B
FRMD8
FRS3
FUT3
GABRB1
GAD2
GBF1
GCM2
GDNF
GDNF-AS1
GDPGP1
GLT1D1
GMDS
GNA12
GNAL
GNE
GOPC
GPC3
GPC5
GPR158
GPR179
GPX6
GRB10
GRB2
GRK1
GRK5
GUCY1A3
GYS2
HARS
HAVCR2
HCN1
HEATR1
HEATR4
HECW1
HFM1
HIF3A
HIST1H2BE
HIST1H3B
HIST1H3E
HK2
HLA-A
HLTF-AS1
HOTTIP
HOXB-AS1
HPSE2
HS6ST3
HSPG2
IFI6
IFIH1
IFT140
IL12A-AS1
IL21-AS1
IL32
IL4I1
ILVBL
INO80
INTS6
IP6K1
IRF4
IRX2
IRX4
ITGA5
ITGAV
ITPA
KCNA1
KCNA2
KCNAB2
KCNB2
KCNC4
KCND2
KCNIP1
KCNIP4
KCNT1
KCTD10
KDM2B
KIAA0430
KIAA1109
KIAA1210
KIAA1614
KIF1C
KIF21A
KLF7
KLF8
KLHDC10
KRT33B
KRT82
KSR2
LACE1
LARGE1
LDHC
LEMD3
LIMCH1
LINC00400
LINC00403
LINC00506
LINC00630
LINC00682
LINC00854
LINC00907
LINC01121
LINC01284
LINC01426
LINC01726
LINC01798
LINC02044
LINC02056
LMBR1
LMX1A
LOC100130872
LOC100130987
LOC100294362
LOC100506136
LOC100506497
LOC100507065
LOC101927078
LOC101927267
LOC101927583
LOC101927588
LOC101928583
LOC101928767
LOC101928844
LOC101929006
LOC101929095
LOC101929488
LOC101929710
LOC102724009
LOC102724050
LOC102724604
LOC102724708
LOC105370888
LOC105371046
LOC554223
LOC648987
LRMP
LRRC20
LRRC3B
LTBP1
LUC7L
LYST
MAGI2
MAP3K11
MAP4
MAPK8
MARCO
MCF2
MCHR2-AS1
MCTP1
MECOM
MEGF6
METTL24
MFSD7
MGC27382
MGMT
MIA-RAB4B
MINOS1
MINOS1-NBL1
MIR548AI
MIR663AHG
MMD2
MNAT1
MROH1
MSH5
MSH5-SAPCD1
MSX1
MT1F
MTERF2
MTHFD2
MTUS2
MUC12
MXRA8
MYBBP1A
MYBPC1
MYO1E
MYO5A
MZF1
MZF1-AS1
NACC1
NAIP
name2
NBPF8
NCAPH2
NDUFA6-AS1
NEDD4
NELFA
NEURL1B
NFKBIL1
NHEJ1
NHLRC1
NLK
NLRP7
NME8
NOL9
NPHS2
NRN1
NSF
NSFP1
NT5E
NTM
NUP210L
NUP62
NUP88
NWD2
NXF2
NXF2B
OC90
OPCML
OR2L13
OSBPL2
OTUB1
PACS1
PACSIN1
PADI1
PAIP2B
PARP8
PAUPAR
PCBP3
PCDHA1
PCDHA10
PCDHA2
PCDHA3
PCDHA4
PCDHA5
PCDHA6
PCDHA7
PCDHA8
PCDHA9
PCED1B
PCLAF
PCMT1
PCNT
PDCD2
PDE1A
PDE1C
PDE4B
PDE9A
PDSS1
PEX7
PFDN1
PFDN5
PGAP3
PHAX
PHC3
PHKA1
PIEZO2
PIK3CB
PIP4K2A
PKLR
PKNOX2
PLCXD3
PLEKHA2
PLS1
PMM2
PODXL2
POU2F1
PPFIA2
PPME1
PPOX
PPP1R37
PPP1R42
PPP1R9A
PPP2R2C
PPP3CA
PPT2
PPT2-EGFL8
PRDM16
PREP
PREX2
PRKCI
PRKCZ
PRKG2
PRPH
PRTN3
PSKH1
PSMB1
PTPRE
PTPRM
PTPRN2
PTPRT
PTPRZ1
PXN
RAB3IP
RAB40A
RAB4B
RAB4B-EGLN2
RAPGEF5
RAPGEF6
RASA3
RASGRP2
RBFOX1
RBM19
RBM42
RERG
RGS12
RGS22
RHOBTB1
RHOBTB3
RHOU
RIMS1
RIN2
RNF121
RNF212
RNF219-AS1
RNF220
RNF34
RNH1
ROR1
RPL8
RPS6KA2
RPTOR
RSRC1
RSRP1
RXFP3
RYR2
SAE1
SAMD13
SAP130
SARDH
SCAMP1
SCN8A
SCO2
SDHAP3
SDK2
SEC16B
SERINC5
SETD4
SETDB1
SEZ6L2
SGK1
SGMS1
SGSM1
SH3BGR
SH3PXD2A
SHANK2
SHISA3
SIK3
SIM1
SIPA1
SIPA1L3
SLC10A4
SLC15A2
SLC22A18AS
SLC25A21
SLC25A37
SLC25A43
SLC25A45
SLC29A1
SLC39A11
SLC44A5
SLC5A1
SLC6A19
SLC6A2
SLIT2
SLK
SMARCA2
SMS
SNCAIP
SND1
SNTG1
SNX18
SNX27
SORBS2
SORCS3
SOX2-OT
SPON2
SQRDL
SRBD1
SRC
SRGAP2C
SRRM1
SRRT
SSU72
ST18
ST7
STAG3
STARD13
STK32B
STYX
SUPT5H
SYCP2L
TAF1
TAP1
TARID
TBC1D30
TCF12
TCOF1
TEAD3
TFRC
THADA
THEMIS
THSD4
TJAP1
TM4SF1
TMC1
TMCC1
TMED4
TMEM110
TMEM110-MUSTN1
TMEM178B
TMEM2
TMEM72-AS1
TMEM94
TMTC4
TNXA
TNXB
TOX2
TP73
TRA2A
TRAK2
TRAPPC12
TRHR
TRIM27
TRIM28
TRIM36
TRIM54
TRMT5
TSNARE1
TSPAN11
TSPAN4
TTYH1
TXNDC16
TXNRD2
UBE2G1
UBQLN4
UCHL1
UGT3A2
UPK1B
USP13
USP34
USP4
UTP11
VARS
VEPH1
VEZT
VGLL4
VHL
VPS37A
VTRNA1-2
WAS
WDPCP
WDR27
WDR33
WDR44
WDR7
WNT3
WRB-SH3BGR
WT1-AS
WWP1
XKR4
XRN2
XXYLT1
YIPF2
ZBED9
ZCCHC24
ZFPM2
ZKSCAN3
ZMAT1
ZMAT4
ZNF37A
ZNF407
ZNF41
ZNF420
ZNF528
ZNF528-AS1
ZNF544
ZNF560
ZNF561
ZNF606
ZNF75D
ZNF791
ZNF816
ZNF816-ZNF321P
ZNRD1ASP
ZSCAN5A
ZSCAN9
