# Supplementary figures and images for: Discovery of Molecular DNA Methylation-Based Biomarkers through Genome-Wide Analysis of Response Patterns to BCG for Bladder Cancer
Source: MDPI journal article supplement (doi:10.3390/cells9081839), 2020-08-05

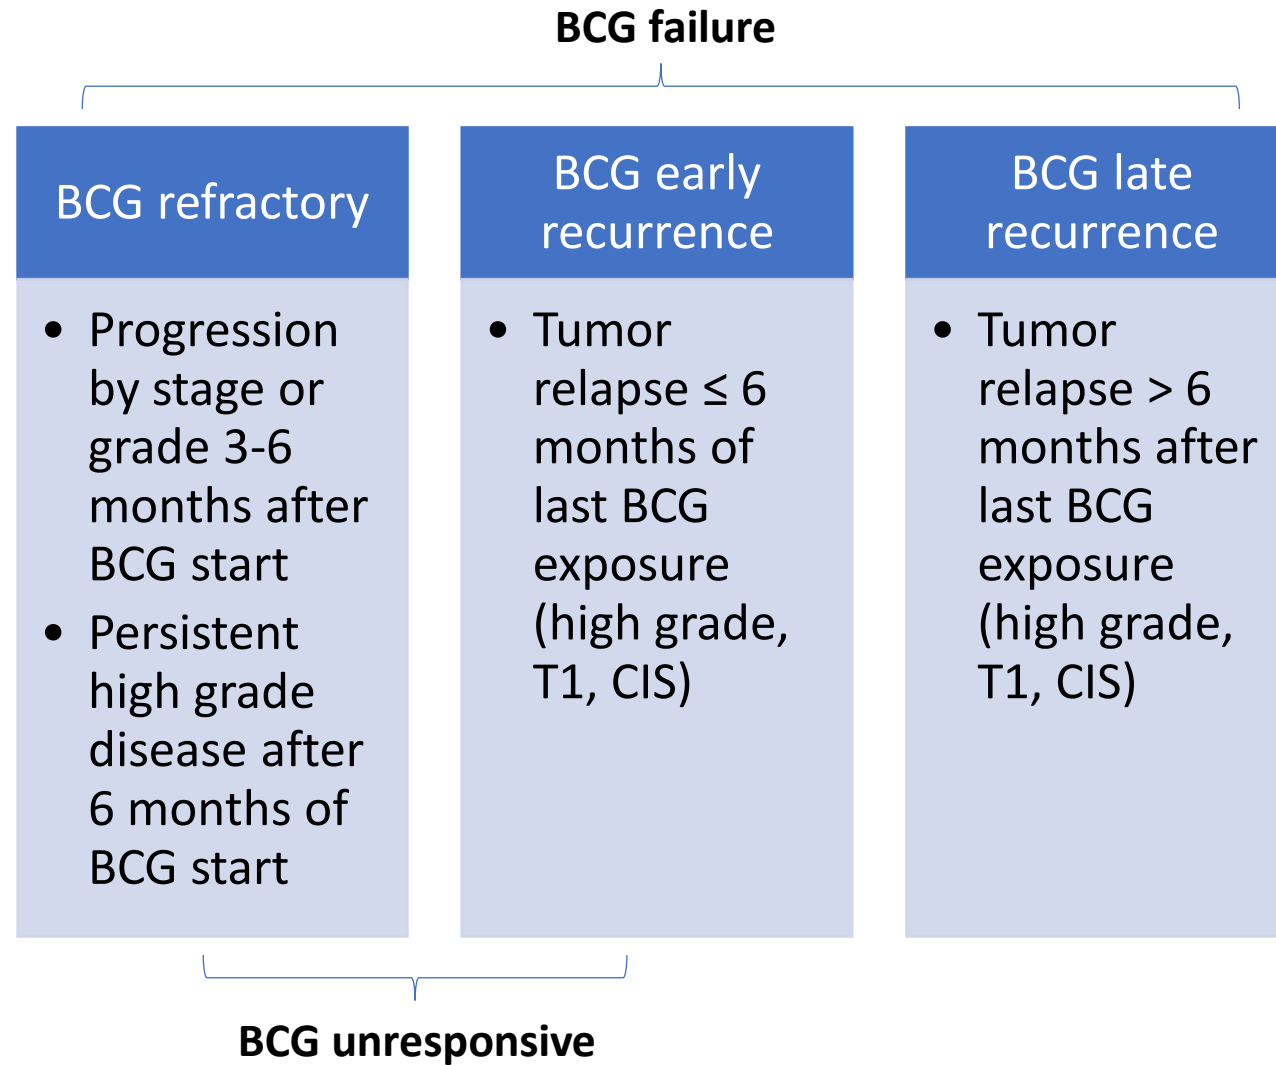

Supplementary Figure 1

Supplement: s1 [file s1]

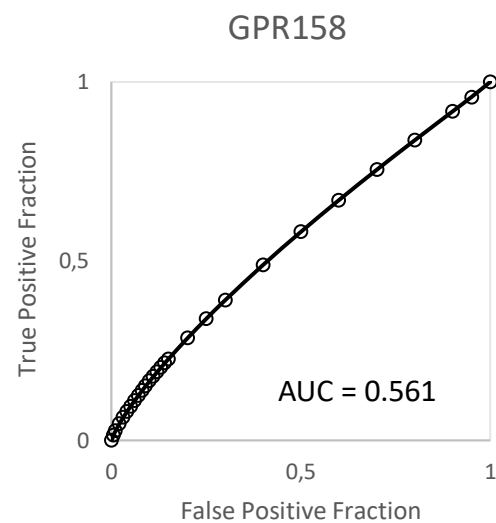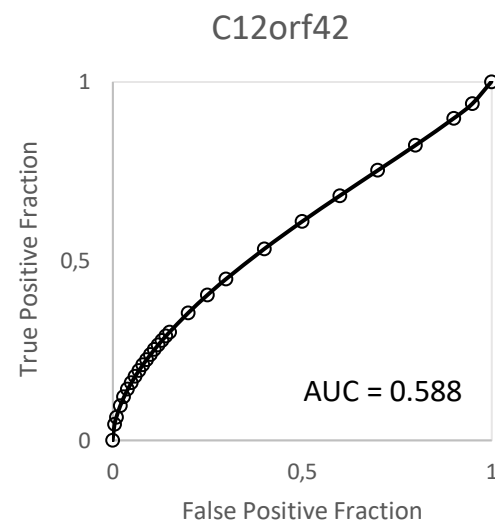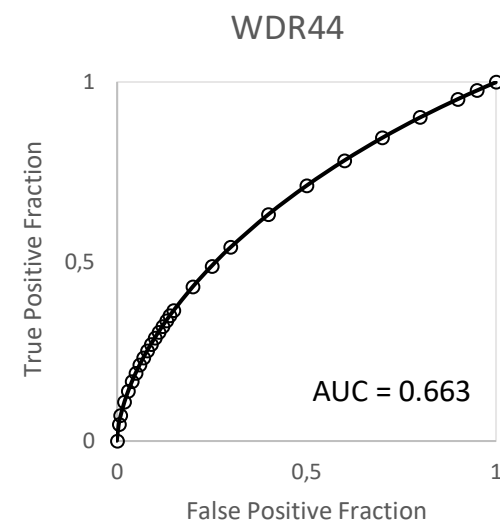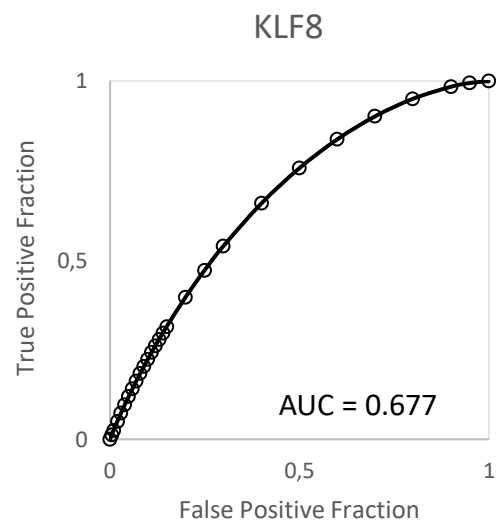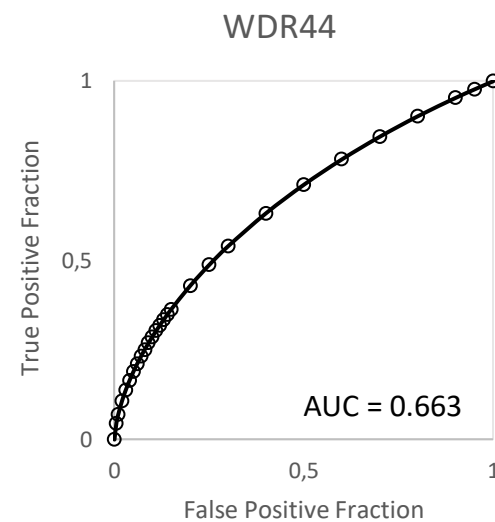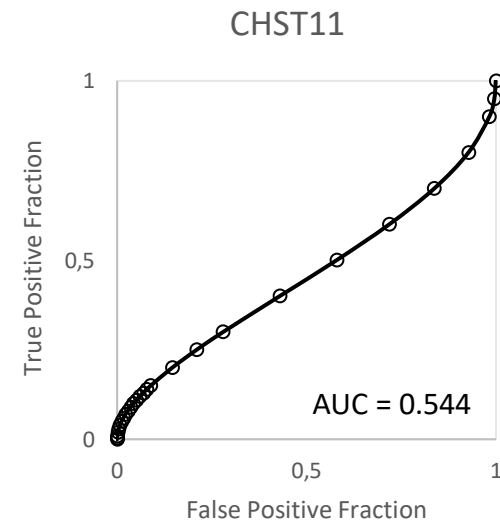

Supplementary Figure 4

Supplement: s1 [file s1]

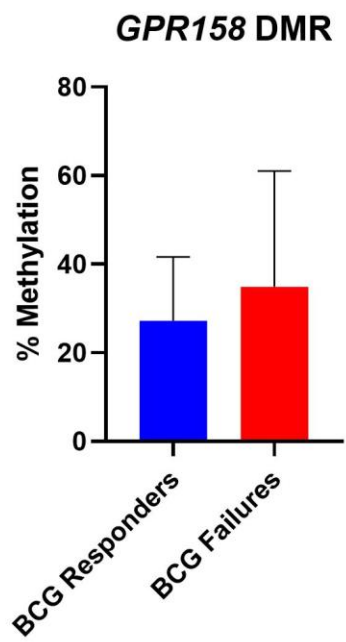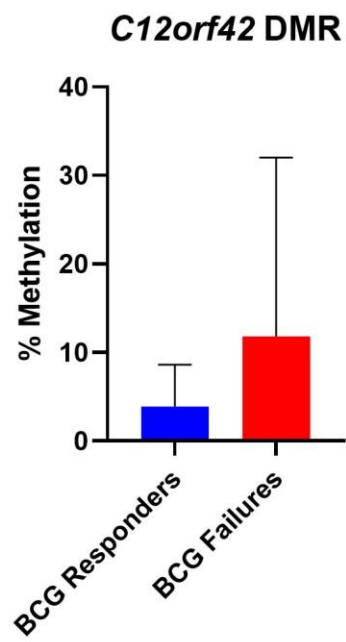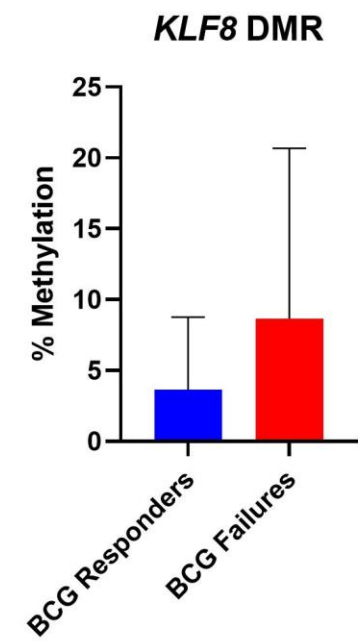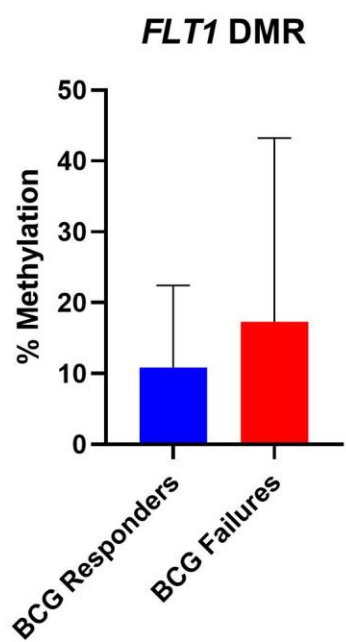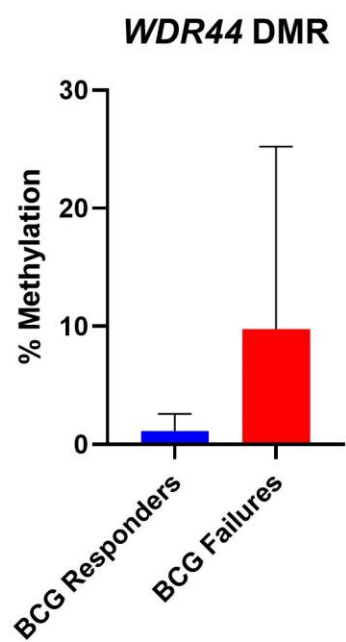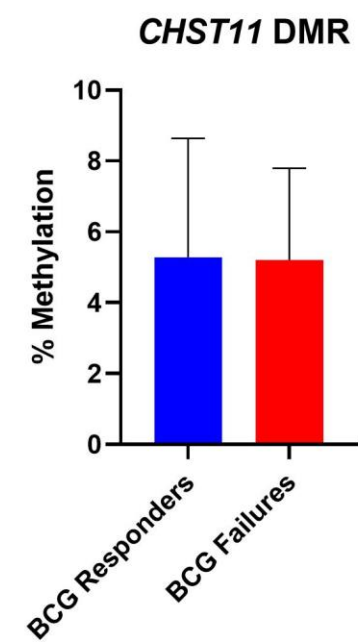

Supplementary Figure 3

Supplement: s1 [file s1]

## A GPR158 protein expression

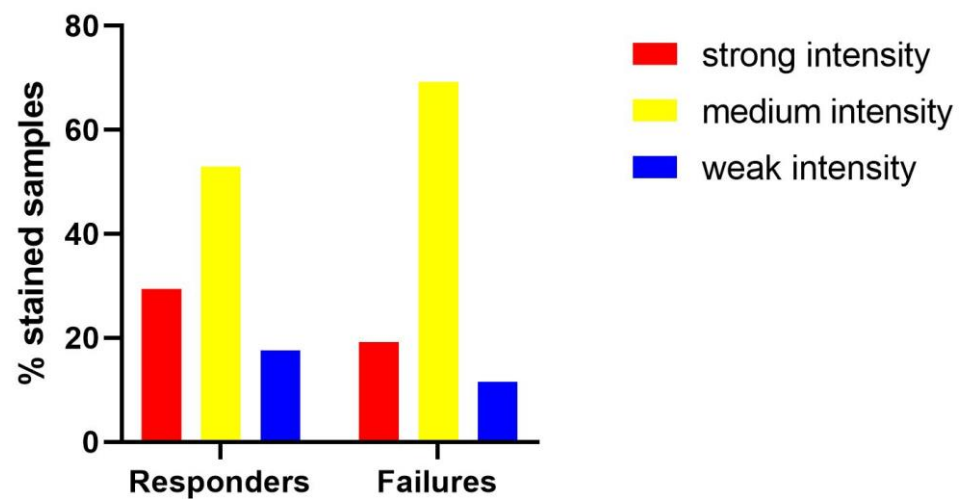

Supplementary Figure 5

## B

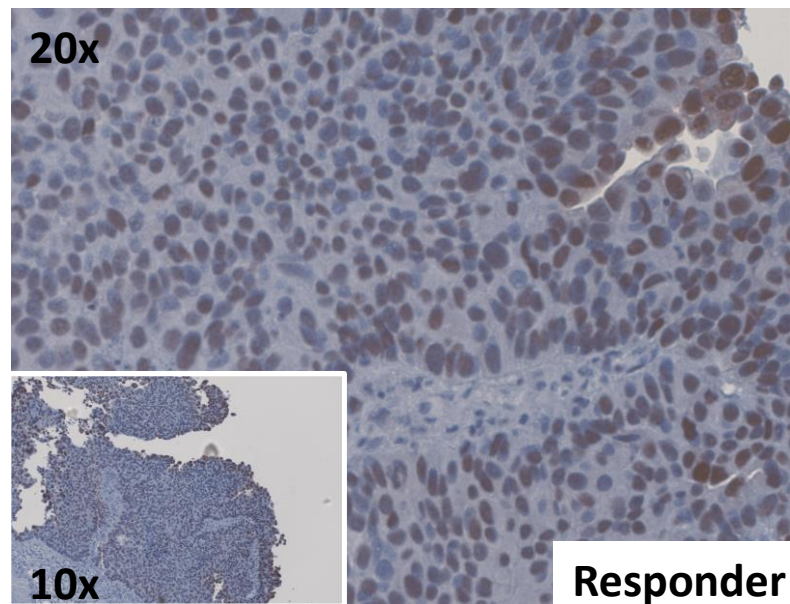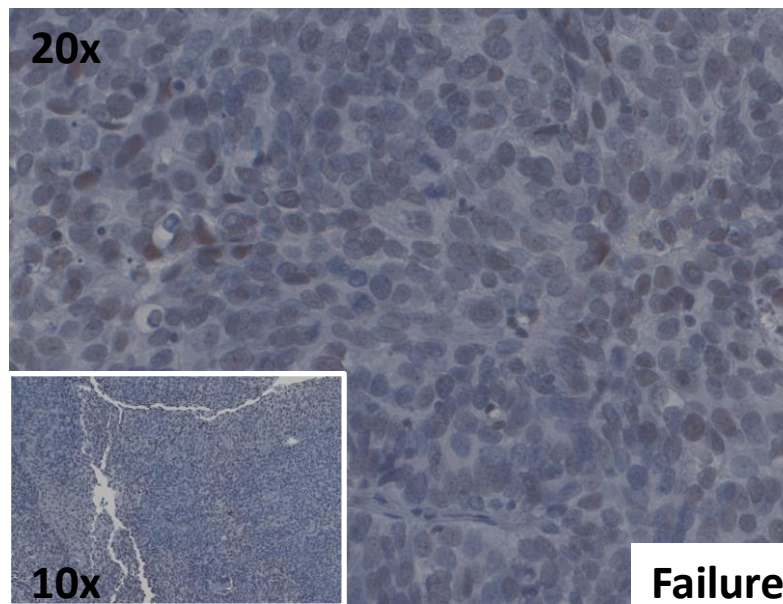

Supplement: s1 [file s1]

**A**

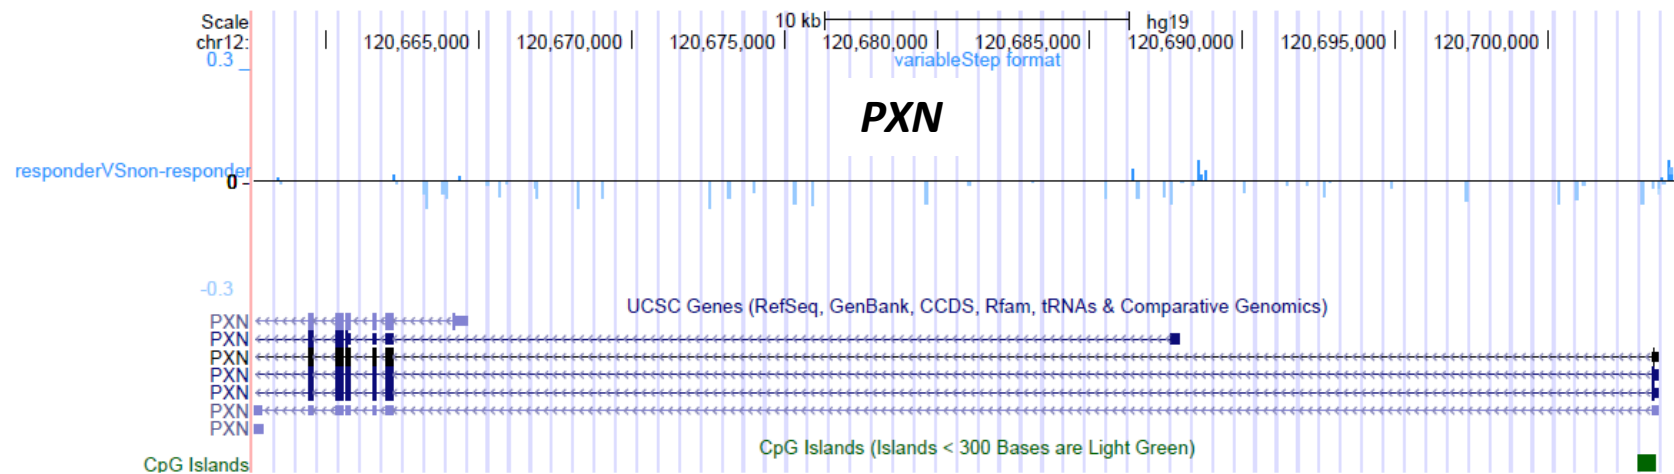

Supplementary Figure 2

**B Paxillin protein expression**

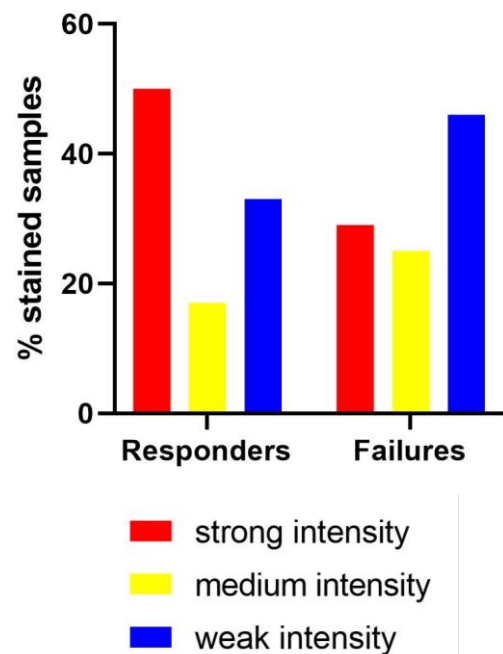

**C**

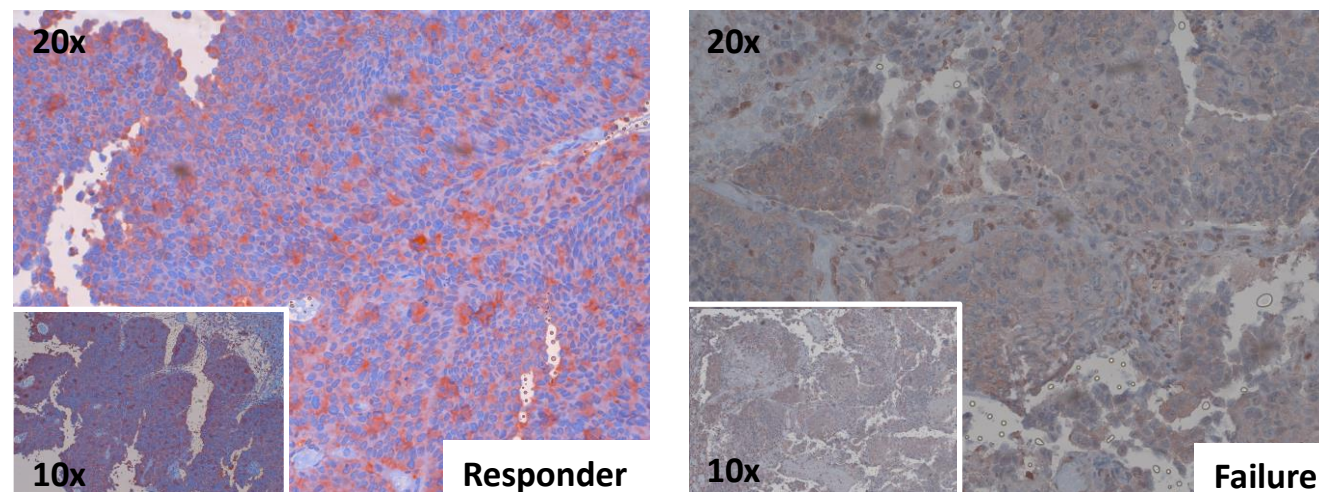

Supplement: s1 [file s1]
